# Supplementary material
Source: publisher figshare collection journal article supplement (https://future-science-group.figshare.com/ndownloader/files/28881726)
Supplement: Supplementary file 1 [file 28881726]

**Supplementary Table 1 Scoring sheet according to Newcastle-Ottawa scale.**

| Study | Selection  (4 to be full ) | | | | Comparability  (2 to be full ) | | | | | Outcome  (3 to be full ) | | | Overall score  (9 to be full ) |
| --- | --- | --- | --- | --- | --- | --- | --- | --- | --- | --- | --- | --- | --- |
|  | Represent-ativeness of the exposed cohort | Selection of the non exposed cohort | Ascertainm-ent of exposure | Outcome of interest was not present at start of study | Age | Sex | Tumo-ur size | Liver function | Tumor number | Assessment of outcome | Was follow-up long enough for outcomes to occur | Adequacy of follow up of cohorts |  |
| Rajyaguru DJ | Yes | Yes | Yes | Yes | Yes | Yes | Yes | NR | NR | Yes | Yes | NR | 7 |
| Parikh ND | Yes | Yes | Yes | Yes | Yes | Yes | NR | NR | NR | Yes | Yes | NR | 7 |
| Kim N | Yes | Yes | Yes | Yes | Yes | Yes | Yes | Yes | Yes | Yes | Yes | Yes | 9 |
| Wahl DR | Yes | Yes | Yes | Yes | Yes | Yes | Yes | Yes | Yes | Yes | Yes | NR | 8 |
| Zhang T | Yes | Yes | Yes | Yes | Yes | Yes | Yes | Yes | Yes | Yes | Yes | Yes | 9 |
| Xiao JC | Yes | Yes | Yes | Yes | Yes | Yes | Yes | Yes | Yes | Yes | Yes | Yes | 9 |
| Shiozawa | Yes | Yes | Yes | Yes | Yes | Yes | Yes | Yes | Yes | Yes | Yes | NR | 8 |
| Kim N | Yes | Yes | Yes | Yes | Yes | Yes | Yes | Yes | Yes | Yes | Yes | Yes | 9 |
| Hara K | Yes | Yes | Yes | Yes | Yes | Yes | Yes | Yes | Yes | Yes | Yes | NR | 8 |
| Pan YX | Yes | Yes | Yes | Yes | Yes | Yes | Yes | Yes | NR | Yes | Yes | NR | 8 |
| Jeong Y | Yes | Yes | Yes | Yes | Yes | Yes | Yes | Yes | Yes | Yes | Yes | NR | 8 |
| NR: not reported. | | | | | | | | | | | | | |
